# Supplementary material for: Host molecules inside metal–organic frameworks: host@MOF and guest@host@MOF (Matrjoschka) materials
Source: Royal Society of Chemistry journal article supplement (doi:10.1039/d4cs00371c), 2024-11-26
Supplement: d4cs00371c1.pdf [file d4cs00371c1.pdf]

Electronic Supplementary Information (ESI) for

## **Host molecules inside metal-organic frameworks: host@MOF and guest@host@MOF (Matrjoschka) materials**

Qiao Wu,<sup>a</sup> Jun Liang,<sup>\*a,c</sup> Dan Wang,<sup>a</sup> Ruihu Wang,<sup>\*a,c</sup> and Christoph Janiak<sup>\*b</sup>

<sup>a</sup> School of Chemical Engineering and Technology, Hebei University of Technology, 300401 Tianjin, China

<sup>b</sup> Institut für Anorganische Chemie und Strukturchemie, Heinrich–Heine–Universität Düsseldorf, 40204 Düsseldorf, Germany

<sup>c</sup> State Key Laboratory of Structural Chemistry, Fujian Institute of Research on the Structure of Matter, Chinese Academy of Sciences Fuzhou, Fujian 350002, China

\* Corresponding author.

*E-mail address:* [janiak@uni-duesseldorf.de](mailto:janiak@uni-duesseldorf.de); [jliang@hebut.edu.cn](mailto:jliang@hebut.edu.cn); [ruihu@fjirms.ac.cn](mailto:ruihu@fjirms.ac.cn);

**Table S1** Examples of the synthetic approaches and applications of representative host@MOF and guest@host@MOF materials.

| Material                                                                                        | Host molecule                                                             | Approach                                        | Application                                                                             | Ref |
|-------------------------------------------------------------------------------------------------|---------------------------------------------------------------------------|-------------------------------------------------|-----------------------------------------------------------------------------------------|-----|
| <b>Porphyrin@MOF</b>                                                                            |                                                                           |                                                 |                                                                                         |     |
| M@TMPyP@MOM-2<br>(M=Mn <sup>2+</sup> , Cu <sup>2+</sup> , Zn <sup>2+</sup> , Co <sup>2+</sup> ) | [H <sub>2</sub> TMPyP] <sup>4+</sup> [p-tosyl <sup>-</sup> ] <sub>4</sub> | Bottle-around-ship<br>Post-synthetic metalation | Cyclohexane oxidation                                                                   | 44  |
| Pt@TMPyP@MOM-2                                                                                  | [H <sub>2</sub> TMPyP] <sup>4+</sup> [Cl <sup>-</sup> ] <sub>4</sub>      | Bottle-around-ship                              | Sulfide ion sensing                                                                     | 45  |
| M@4SP@HKUST-1(Cu, Zn)<br>M = Fe <sup>3+</sup> , Mn <sup>3+</sup>                                | [H <sup>+</sup> ] <sub>4</sub> [H <sub>2</sub> 4SP] <sup>4-</sup>         | Bottle-around-ship                              | Monooxygenation                                                                         | 46  |
| M@TMPyP@MOM-n<br>(M = Fe <sup>2+</sup> , Co <sup>2+</sup> , Mn <sup>2+</sup> )<br>(n=4, 5, 6)   | [H <sub>2</sub> TMPyP] <sup>4+</sup> [p-tosyl <sup>-</sup> ] <sub>4</sub> | Bottle-around-ship                              | Olefin oxidation                                                                        | 47  |
| Cd@TMPyP@MOM-10(Cd)                                                                             | [H <sub>2</sub> TMPyP] <sup>4+</sup> [p-tosyl <sup>-</sup> ] <sub>4</sub> | Bottle-around-ship                              | -                                                                                       | 48  |
| Mn@TMPyP@MOM-10(Mn)                                                                             | [H <sub>2</sub> TMPyP] <sup>4+</sup> [p-tosyl <sup>-</sup> ] <sub>4</sub> | Post-synthetic metal exchange                   | Epoxidation of trans-stilbene                                                           | 48  |
| Cu@TMPyP@MOM-10(CdCu)                                                                           | [H <sub>2</sub> TMPyP] <sup>4+</sup> [p-tosyl <sup>-</sup> ] <sub>4</sub> | Post-synthetic metal exchange                   | Epoxidation of trans-stilbene                                                           | 48  |
| Cd@TMPyP@MOM-11(Cd)                                                                             | [H <sub>2</sub> TMPyP] <sup>4+</sup> [p-tosyl <sup>-</sup> ] <sub>4</sub> | Bottle-around-ship                              | CO <sub>2</sub> adsorption                                                              | 49  |
| Mn@TMPyP@ZIF-8                                                                                  | [H <sub>2</sub> TMPyP] <sup>4+</sup> [I <sup>-</sup> ] <sub>4</sub>       | Bottle-around-ship                              | Cyclic addition of CO <sub>2</sub> with epoxide                                         | 50  |
| Zn@TMPyP@PCN-224                                                                                | [H <sub>2</sub> TMPyP] <sup>4+</sup> [I <sup>-</sup> ] <sub>4</sub>       | Impregnation                                    | Cyclic addition of CO <sub>2</sub> with epoxide                                         | 51  |
| Fe@TCPP in HKUST-1(Cu)                                                                          | H <sub>2</sub> TCPP                                                       | Bottle-around-ship                              | Electrochemical DNA sensing                                                             | 52  |
| <b>Phthalocyanine@MOF</b>                                                                       |                                                                           |                                                 |                                                                                         |     |
| M@PcF <sub>16</sub> @MIL-101(Cr)<br>M= Fe <sup>3+</sup> , Ru <sup>2+</sup>                      | H <sub>2</sub> PcF <sub>16</sub>                                          | Impregnation                                    | Oxidation of tetralin                                                                   | 54  |
| M@Pc@bio-MOF-1<br>(M= Co <sup>2+</sup> , Ni <sup>2+</sup> , Cu <sup>2+</sup> )                  | H <sub>2</sub> Pc                                                         | Ship-in-bottle                                  | Styrene epoxidation                                                                     | 55  |
| M@Pc@MIL-101<br>(M= Cu <sup>2+</sup> , Co <sup>2+</sup> , Ni <sup>2+</sup> )                    | H <sub>2</sub> Pc                                                         | Ship-in-bottle                                  | Oxidative amidation                                                                     | 56  |
| Cu@Pc@MIL-101(Cr)                                                                               | H <sub>2</sub> Pc                                                         | Ship-in-bottle                                  | Styrene epoxidation                                                                     | 57  |
| Cu@Pc@MIL-100(Fe)                                                                               | H <sub>2</sub> Pc                                                         | Ship-in-bottle                                  | Styrene epoxidation                                                                     | 57  |
| <b>Crown ether@MOF</b>                                                                          |                                                                           |                                                 |                                                                                         |     |
| 18C6@ZIF-67/18C6@ZIF-8 membrane                                                                 | 18C6                                                                      | Bottle-around-ship                              | Selective Li <sup>+</sup> /K <sup>+</sup> and Na <sup>+</sup> /K <sup>+</sup> transport | 58  |
| BCE@ZIF-7                                                                                       | BCE                                                                       | Bottle-around-ship                              | -                                                                                       | 59  |
| M@BCE@ZIF-7 (M=Li <sup>+</sup> , Mg <sup>2+</sup> , Al <sup>3+</sup> )                          | BCE                                                                       | Bottle-around-ship                              | Selective Li <sup>+</sup> /Mg <sup>2+</sup> transport                                   | 59  |
| DB15C5@UiO-66                                                                                   | DB15C5                                                                    | Bottle-around-ship                              | Selective K <sup>+</sup> /Mg <sup>2+</sup> transport                                    | 60  |
| DB18C6@UiO-66                                                                                   | DB18C6                                                                    | Bottle-around-ship                              | Selective K <sup>+</sup> /Mg <sup>2+</sup> transport                                    | 60  |
| B15C5@ZIF-8                                                                                     | B15C5                                                                     | Bottle-around-ship                              | C <sub>3</sub> H <sub>6</sub> /C <sub>3</sub> H <sub>8</sub> separation                 | 61  |
| <b>Calixarene@MOF</b>                                                                           |                                                                           |                                                 |                                                                                         |     |
| CA-1@MOF-5                                                                                      | CA-1                                                                      | Bottle-around-ship                              | -                                                                                       | 62  |
| Pd@CA-2@MOF-5                                                                                   | CA-2                                                                      | Bottle-around-ship                              | Hydrogenation of 2-butyne-1,4-diol                                                      | 63  |

Note: the structures of representative host molecules can be seen in Fig. 2. The reference number and content are consistent with those in the main text.

**Table S1 (continued)** Examples of the synthetic approaches and applications of representative host@MOF and guest@host@MOF materials.

| Material                                                            | Host molecule                                                             | Approach                               | Application                                                                 | Ref |
|---------------------------------------------------------------------|---------------------------------------------------------------------------|----------------------------------------|-----------------------------------------------------------------------------|-----|
| <b>Cavitand@MOF</b>                                                 |                                                                           |                                        |                                                                             |     |
| MeMeCH <sub>2</sub> @ <i>mer</i> -ZIF-10                            | MeMeCH <sub>2</sub>                                                       | Bottle-around-ship                     | -                                                                           | 65  |
| MeMeCH <sub>2</sub> @ <i>rho</i> -Zn <sub>16</sub> Im <sub>32</sub> | MeMeCH <sub>2</sub>                                                       | Bottle-around-ship<br>mechanosynthesis | -                                                                           | 64  |
| <b>Cucurbituril@MOF</b>                                             |                                                                           |                                        |                                                                             |     |
| CB6@MIL-101-36<br>(36 wt% of CB6)                                   | CB6                                                                       | Wet-impregnation                       | CO <sub>2</sub> sorption and<br>CO <sub>2</sub> /CH <sub>4</sub> separation | 25  |
| CB6@MIL-101-CI-31<br>(31 wt% of CB6)                                | CB6                                                                       | Impregnation                           | SO <sub>2</sub> adsorption                                                  | 70  |
| MC5@MIL-100(Fe)-23<br>(23 wt% of MC5)                               | MC5                                                                       | Bottle-around-ship                     | Pb <sup>2+</sup> removal                                                    | 39  |
| <b>Metal organic polyhedron@MOF</b>                                 |                                                                           |                                        |                                                                             |     |
| M <sub>6</sub> L <sub>4</sub> @MIL-101(Cr)                          | M <sub>6</sub> L <sub>4</sub>                                             | Ship-in-bottle                         | Oxidation of<br>benzyl alcohol                                              | 34  |
| NH <sub>2</sub> -MOP@DUT-68(Zr)                                     | NH <sub>2</sub> -MOP<br>or H <sub>2</sub> N-M <sub>4</sub> L <sub>6</sub> | Ship-in-bottle                         | Proton conductivity                                                         | 72  |
| MOP-3@PCN-777                                                       | MOP-3                                                                     | Impregnation                           | Proton conductivity                                                         | 73  |
| NH <sub>2</sub> -MOP@MOA                                            | NH <sub>2</sub> -MOP<br>or H <sub>2</sub> N-M <sub>4</sub> L <sub>6</sub> | Bottle-around-ship                     | Oxoanion removal                                                            | 74  |

Note: the structures of representative host molecules can be seen in Fig. 2. The reference number and content are consistent with those in the main text.

**Table S2** Examples of the synthetic approaches and applications of representative enzyme@MOF as host@MOF materials.

| Material                         | Enzymes                                                  | Approach           | Application                                  | Ref |
|----------------------------------|----------------------------------------------------------|--------------------|----------------------------------------------|-----|
| MP-11@Cu-MOF                     | MP-11 (1.1 nm×1.7 nm×3.3 nm)                             | Impregnation       | Oxidation of methylene blue                  | 75  |
| MP-11@Tb-mesoMOF                 | MP-11 (1.1 nm×1.7 nm×3.3 nm)                             | Impregnation       | Oxidation of 3,5-Di- <i>t</i> -butylcatechol | 76  |
| Cyt c@Tb-mesoMOF                 | Cyt c (2.6 nm×3.2nm×3.3 nm)                              | Impregnation       | -                                            | 77  |
| Protease@MIL-101-NH <sub>2</sub> | Protease (2.85 nm)                                       | Impregnation       | Proteolytic activity for glycyl-L-tyrosine-  | 78  |
| HRP@PCN-333(Al)                  | HRP (4.0 nm×4.4 nm×6.8 nm)                               | Impregnation       | Oxidation of <i>o</i> -Phenylenediamine      | 79  |
| Cyt c@PCN-333(Al)                | Cyt c (2.6 nm×3.2nm×3.3 nm)                              | Impregnation       | Oxidation                                    | 79  |
| MP-11@PCN-333(Al)                | MP-11 (1.1 nm×1.7 nm×3.3 nm)                             |                    | of ABTS                                      |     |
| cutinase@NU-1000(Zr)             | Cutinase                                                 | Impregnation       | Hydrolysis of PNPB                           | 80  |
| cutinase@PCN-600(Zr)             |                                                          |                    |                                              |     |
| HRP/GOx@PCN-888                  | GOx (6.0 nm×5.2 nm×7.7 nm)<br>HRP (4.0 nm×4.4 nm×6.8 nm) | Impregnation       | Oxidation of glucose;<br>Oxidation of ABTS   | 81  |
| Cyt c@ZIF-8                      | Cyt c (2.6 nm×3.2nm×3.3 nm)                              | Bottle-around-ship | Detection of H <sub>2</sub> O <sub>2</sub>   | 83  |
| FCAT@ZIF-90                      |                                                          |                    |                                              |     |
| FCAT@MAF-7                       | FCAT (4.4 nm×4.9 nm×5.6 nm)                              | Bottle-around-ship | H <sub>2</sub> O <sub>2</sub> degradation    | 84  |
| FCAT@ZIF-8                       |                                                          |                    |                                              |     |
| nano BCL@MTV-ZIFs                | BCL                                                      | Bottle-around-ship | Kinetic resolution of (R,S)-2-octanol        | 85  |
| Cyt c@NKMOF-101-Zn               | Cyt c (2.6 nm×3.2nm×3.3 nm)                              | Bottle-around-ship | Oxidation of ABTS                            | 86  |
| $\alpha$ -G/GOx@Cu-MOF           | $\alpha$ -glucosidase<br>and GOx                         | Bottle-around-ship | Hydrolysis and oxidation of maltose          | 87  |
| CRL@ZIF-8                        | CRL                                                      | Bottle-around-ship | Hydrolysis of PNPB                           | 88  |
| urease@ZIF-8                     | Urease                                                   | Bottle-around-ship | Hydrolysis                                   | 89  |
| HRP@ZIF-8                        | HRP (4.0 nm×4.4 nm×6.8 nm)                               |                    | Oxidation                                    |     |
| catalase@ZIF-90                  | catalase                                                 | Bottle-around-ship | H <sub>2</sub> O <sub>2</sub> degradation    | 90  |
| OPAA@PCN-128y                    | OPAA (4.4 nm×4.4nm×7.8 nm)                               | Impregnation       | Detoxifying DFP and Soman                    | 104 |
| $\beta$ -G@Cu(PABA)              | $\beta$ -Glucosidase                                     | Bottle-around-ship | Hydrolysis of cellulose                      | 105 |
| GOx/HRP@ZIF-8                    | GOx (6.0 nm×5.2 nm×7.7 nm)<br>HRP (4.0 nm×4.4 nm×6.8 nm) | Bottle-around-ship | Oxidation of glucose and ABTS                | 107 |
| FaldDH/FateDH@ZIF-8              | FaldDH and FateDH                                        | Bottle-around-ship | Photocatalytic CO <sub>2</sub> reduction     | 108 |

Note: The reference number and content are consistent with those in the manuscript.

**Table S2 (continued)** Examples of the synthetic approaches and applications of representative enzyme@MOF as host@MOF materials.

| Material                       | Enzymes                                                  | Approach           | Application                    | Ref        |
|--------------------------------|----------------------------------------------------------|--------------------|--------------------------------|------------|
| GOx@ZIF-8                      | GOx (6.0 nm×5.2 nm×7.7 nm)                               | Bottle-around-ship | Detection of glucose           | 110<br>111 |
| GOx/HRP@DNA/ZIF-8              | GOx (6.0 nm×5.2 nm×7.7 nm)<br>HRP (4.0 nm×4.4 nm×6.8 nm) | Bottle-around-ship | Detection of glucose           | 112        |
| GOx@MAF-2                      | GOx (6.0 nm×5.2 nm×7.7 nm)                               | Bottle-around-ship | Detection of glucose           | 113        |
| GOD@GA-Ni/Cu-MOF               | GOD                                                      | Impregnation       | Detection of glucose           | 114        |
| Urease@ZIF-8                   | Urease                                                   | Bottle-around-ship | Detection of urea              | 115        |
| UOx/HRP@ZIF-8                  | Urate oxidase<br>HRP (4.0 nm×4.4 nm×6.8 nm)              | Bottle-around-ship | Detection of uric acid         | 115        |
| β-Gal/Ox/HRP@ZIF-8             | β-galactosidase and<br>oxidase and HRP                   | Bottle-around-ship | Detection of lactose           | 115        |
| Peptide-HRP@ZIF-90             | HRP (4.0 nm×4.4 nm×6.8 nm)                               | Bottle-around-ship | Detection of SPARC             | 116        |
| Lac@MCS/UiO-66-NH <sub>2</sub> | Laccase                                                  | Impregnation       | Tetracycline detection         | 117        |
| Cas12a@MAF-7                   | Cas12a nuclease                                          | Impregnation       | Detection of<br>SARS-CoV-2 RNA | 118        |

Note: The reference number and content are consistent with those in the manuscript.

### Abbreviations and acronyms used in Table S1 and Table S2:

#### For MOFs:

MOM = metal-organic material as a series of specific MOFs;

HKUST = Hong Kong University of Science and Technology;

HKUST-1 = a MOF composed of Cu<sub>2</sub> nodes and trimesic acid ligands;

ZIF = Zeolitic Imidazolate Framework;

ZIF-8 = a ZIF composed of zinc ions and 2-methylimidazole ligands;

ZIF-67 = a ZIF composed of cobalt ions and 2-methylimidazole ligands;

ZIF-7 = a ZIF composed of zinc ions and benzimidazole ligands;

ZIF-90 = a ZIF composed of zinc ions and imidazole-2-carboxaldehyde ligands;

PCN = Porous Coordination Network;

PCN-224 = a MOF composed of Zr<sub>6</sub> nodes and meso-5,10,15,20-tetrakis(4-carboxyphenyl) porphyrin;

PCN-777 = a MOF composed of Zr<sub>6</sub> nodes and 4,4',4''-s-triazine-2,4,6-triyl-tribenzoate;

PCN-333 = a MOF composed of aluminum ions and 4,4',4''-s-triazine-2,4,6-triyl-tribenzoate ligands;

PCN-600 = a MOF composed of Fe<sub>3</sub> nodes and tetrakis (4-carboxyphenyl) porphyrin ligands;

PCN-888 = a MOF composed of aluminum trimeric cluster and heptazine based tritopic ligand;

PCN-128y = a MOF composed of Zr<sub>6</sub> nodes and (4',4''',4''''',4''''''-(ethene-1,1,2,2-tetrayl)tetrakis([1,1'-biphenyl]-4-carboxylic acid))) (H<sub>4</sub>ETTC);

MIL = Material Institute Lavoisier;

MIL-101(M) = a MOF composed of M<sub>3</sub>O (M= Cr, Fe,) nodes and terephthalic acid ligands;

MIL-101-NH<sub>2</sub> = a MOF composed of Cr<sub>3</sub>O nodes and 2-aminoterephthalic acid ligands;

UiO = University of Oslo;

UiO-66 = a MOF composed of Zr<sub>6</sub> nodes and 1,4-benzenedicarboxylic acid ligands;

UiO-66-NH<sub>2</sub> = a MOF composed of Zr<sub>6</sub> nodes and 2-aminoterephthalic acid ligands;  
 MOF-5 = a MOF composed of zinc ions and terephthalic acid ligands;  
 DUT = Dresden University of Technology;  
 DUT-68 = a MOF composed of Zr<sub>6</sub> nodes and 2,5-thiophenedicarboxylic acid ligands (H<sub>2</sub>TDC);  
 NU = Northwestern University;  
 NU-1000 = a MOF composed of Zr<sub>6</sub> nodes and 1,3,6,8-tetrakis(p-benzoic acid)pyrene ligands;  
 MAF = Metal Azolate Framework;  
 MAF-7 = a MOF composed of zinc ions and 3-methyl-1,2,4-triazole ligands;  
 NKMOF-101-Zn = a MOF composed of zinc ions and squaric acid ligands;  
 MOA = Metal-organic aerogel;

**For molecules:**

[H<sub>2</sub>TMPyP]<sup>4+</sup>[X]<sub>4</sub> = 5,10,15,20-tetrakis(1-methyl-4-pyridinium)porphyrin,  
 X = *p*-tosyl<sup>-</sup>, Cl<sup>-</sup>, or I<sup>-</sup> as shown in Fig. 2a, top;  
 [H<sup>+</sup>]<sub>4</sub>[H<sub>2</sub>4SP]<sup>4-</sup> = tetrakis(4-sulphonatophenyl)porphyrin as shown in Fig. 2a, middle;  
 H<sub>2</sub>TCPP = meso-5,10,15,20-tetrakis(4-carboxyphenyl) porphyrin as shown in Fig. 2a, bottom;  
 H<sub>2</sub>Pc = phthalocyanine as shown in Fig. 2b, top;  
 H<sub>2</sub>PcF<sub>16</sub> = perfluorinated phthalocyanine as shown in Fig. 2b, bottom;  
 18C6 = 18-crown-6 as shown in Fig. 2c;  
 BCE = benzo-12-crown-4-ether as shown in Fig. 2d;  
 DB15C5 = dibenzo-15-crown-5 as shown in Fig. 2e;  
 DB18C6 = dibenzo-18-crown-6 as shown in Fig. 2f;  
 B15C5 = benzo-15-crown-5 as shown in Fig. 2g;  
 CA-1 = calix[4]arene derivate with carboxylic acid groups at ortho-position as shown in Fig. 2h ;  
 CA-2 = thiacalix[4]arene with carboxylic acid groups at ortho-position as shown in Fig. 2i;  
 MeMeCH<sub>2</sub> = a bowl-shaped cavitand with four methyl groups on both rims as shown in Fig. 2j;  
 MC5 = decamethylcucurbit[5]uril as shown in Fig. 2k;  
 CB6 = cucurbit[6]uril as shown in Fig. 2l;  
 M<sub>6</sub>L<sub>4</sub> = an octahedral assembly with six Pd(II) nodes and four 1,3,5-tris(4-pyridyl)-2,4,6-triazine ligands, Fig. 2m;  
 H<sub>2</sub>N-M<sub>4</sub>L<sub>6</sub> = an amino-functionalized Zr-based tetrahedron with the formula of  
 ([Cp<sub>3</sub>Zr<sub>3</sub>O(OH)<sub>3</sub>]<sub>4</sub>(NH<sub>2</sub>-BDC)<sub>6</sub>·Cl<sub>4</sub>) as shown in Fig. 2n;  
 MOP-3 = a nanosized cuboctahedron with the formula of Na<sub>6</sub>H<sub>18</sub>[Cu<sub>24</sub>(SO<sub>3</sub><sup>-</sup>-*m*BDC)<sub>24</sub>(G)<sub>24</sub>],  
 G represents coordinated solvent on Cu<sub>2</sub> node.  
 MP-11 = microperoxidase-11 with a molecular size of 1.1 nm×1.7 nm×3.3 nm;  
 Cyt c = cytochrome c with a molecular size of 2.6 nm×3.2nm×3.3 nm;  
 Protease with a molecular size of 2.85 nm;  
 HRP = horseradish peroxidase with a molecular size of 4.0 nm×4.4 nm×6.8 nm;  
 GOx = glucose oxidase with a molecular size of 6.0 nm×5.2 nm×7.7 nm;  
 FCAT = fluorescein-tagged catalase with a molecular size of 4.4 nm×4.9 nm×5.6 nm;

BCL = *Burkholderia cepacia* lipase;

$\alpha$ -G =  $\alpha$ -glucosidase;

$\beta$ -G =  $\beta$ -glucosidase;

OPAA = organophosphorus acid anhydrolase with a molecular size of 4.4 nm×4.4nm×7.8 nm;

PABA = *p*-aminobenzoic acid;

CRL = lipase from *Candida rugosa*;

GOD = glucose oxidase;

UOx = Urate oxidase;

ABTS = 2,2'-azino-bis(3-ethylbenzothiazoline-6-sulfonate);

PNPB = *p*-nitrophenyl butyrate;

DFP = diisopropyl fluorophosphate;

Soman = O-pinacolyl methyl fluorophosphonate;

SPARC = secreted protein acidic and rich in cysteine.

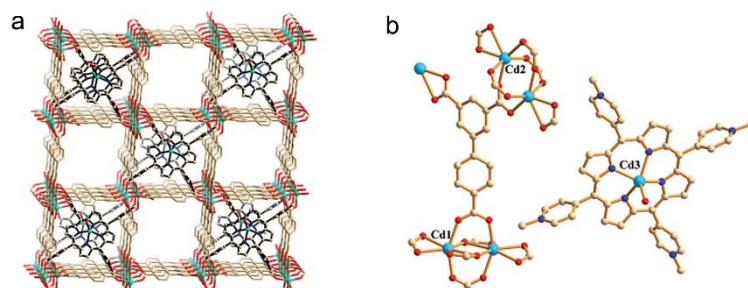

**Fig. S1.** a) View of the crystal packing in Cd@TMPyP@MOM-11(Cd); b) coordination environments of the Cd<sup>2+</sup> ions in Cd@TMPyP@MOM-11(Cd). Turquoise Cd, beige C, red O, blue N. Reproduced from ref. 49 with permission of Wiley-VCH Verlag GmbH & Co., Copyright 2012.

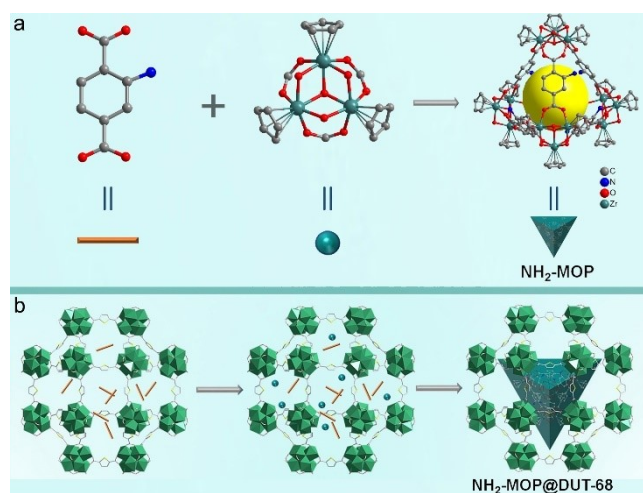

**Fig. S2.** a) Schematic preparation of the cuboctahedron NH<sub>2</sub>-MOP, and b) the "ship-in-a-bottle" synthesis of NH<sub>2</sub>-MOP@DUT-68. Adapted from ref. 72 with permission of Wiley-VCH Verlag GmbH & Co., Copyright 2021.

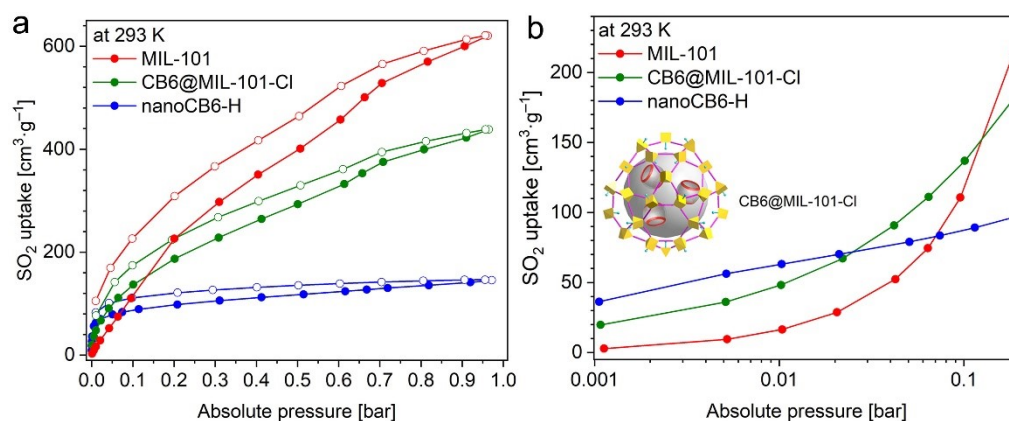

**Fig. S3.** SO<sub>2</sub> sorption isotherms of CB6@MIL-101-Cl-31 up to 1 bar at 293K and 298K, respectively. a) full pressure range, and b) low pressure range. Reproduced from ref. 70 with permission of the Royal Society of Chemistry, Copyright 2021.



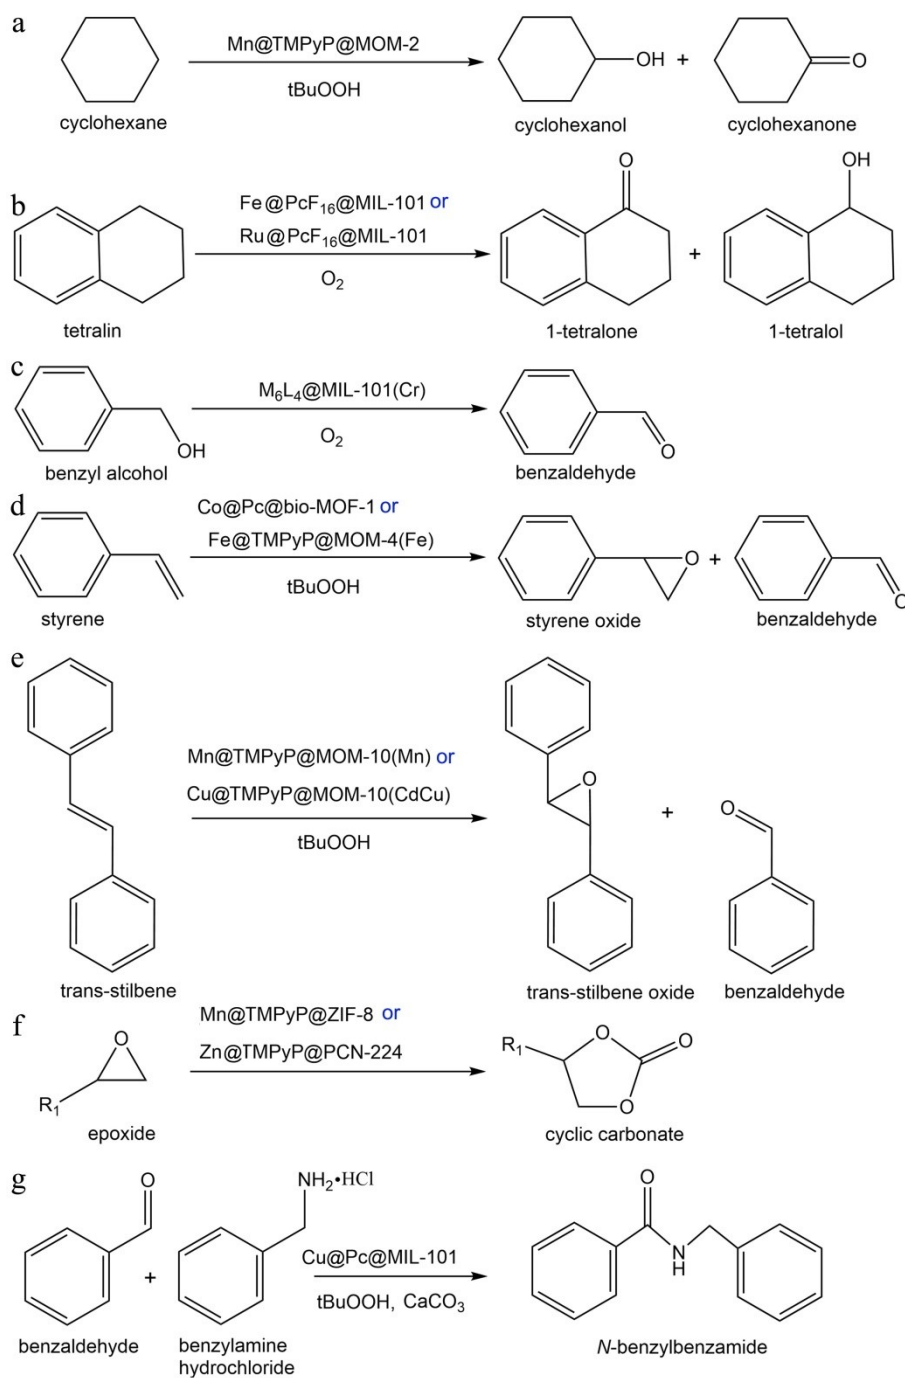

**Fig. S4** Representative organic reactions catalyzed by host@MOF and metal@host@MOF materials. a) Oxidation of cyclohexane, b) oxidation of tetralin, c) oxidation of benzyl alcohol, d) oxidation of styrene, e) oxidation of trans-stilbene, f) cyclic carbonation, g) benzamide reaction. The used catalysts and oxidant/reagent are presented above and below the arrow, respectively.
